# Supplementary material for: SAC3D1: a novel prognostic marker in hepatocellular carcinoma
Source: PubMed Central journal article supplement (PMC6199250; doi:10.1038/s41598-018-34129-9), 2018-10-23
Supplement: 41598_2018_34129_MOESM1_ESM.pdf [file 41598_2018_34129_MOESM1_ESM.pdf]

## **SAC3D1: a novel prognostic marker in hepatocellular carcinoma**

Myeong-Eun Han<sup>1</sup>, Ji-Young Kim<sup>1</sup>, Ga Hyun Kim<sup>1</sup>, Si Young Park<sup>1</sup>, Yun Hak Kim<sup>1,2,\*</sup>, Sae-Ock Oh<sup>1,\*</sup>

<sup>1</sup>Department of Anatomy, School of Medicine, Pusan National University, Yangsan, Republic of Korea

<sup>2</sup>BEER, Busan society of Evidence-based mEdicine and Research, Busan, Republic of Korea

Myeong-Eun Han and Ji-Young Kim contributed equally to this work.

Figures: 3

Tables: 5

Corresponding authors:

Yun Hak Kim, MD, PhD.

Department of Anatomy, School of Medicine, Pusan National University,

Yangsan, Gyeongnam, Republic of Korea

Tel: +82-51-510-8091, Fax: +82-51-510-8049

E-mail: [yunhak10510@pusan.ac.kr](mailto:yunhak10510@pusan.ac.kr)

Sae-Ock Oh, MD, PhD.

Department of Anatomy, School of Medicine, Pusan National University,

Yangsan, Gyeongnam, Republic of Korea

Tel: +82-51-510-8045, Fax: +82-51-510-8049

E-mail: [hedgehog@pusan.ac.kr](mailto:hedgehog@pusan.ac.kr)

## **Supplementary Information**

**Supplementary Figure S1. Comparison of overall survival between hepatitis B and non-hepatitis B HCC patients.** (A) Kaplan-Meier survival curve of HCC patients with respect to hepatitis B virus infection. (B) Differences of cancer stage between hepatitis B and non-hepatitis B HCC patients. HBV (-) or (+) means no infection or infection of hepatitis B virus. Relative percent = [HBV (-) or (+) patients in given stage] / [Total HCC patients in given stage].

**Supplementary Figure S2. Kaplan-Meier survival analysis of HCC patients with respect to SAC3D1 gene expression.** Survival analysis was performed for each subgroup of patients in TCGA cohort. P-value was calculated using the log-rank test and is provided at the bottom right of each graph.

**Supplementary Figure S3. Expression levels of SAC3D1 in patients with HCC (GSE20238).** 0 means no vascular invasion, and 1 means vascular invasion.

**Supplementary Table S1. Optimal cutoff values of genes in each cohort.**

**Supplementary Table S2. Patients' information of used in current research in the GSE20238.**

**Supplementary File 1. Data combining the clinical and genetic information of the GSE10186 cohort (R data).**

**Supplementary File 2. Data combining the clinical and genetic information of the TCGA cohort (R data).**

**Supplementary File 3. Data combining the clinical and genetic information of the ICGC cohort (R data).**

**Supplementary File 4. R code for the GSE10186 cohort.**

**Supplementary File 5. R code for the TCGA cohort.**

**Supplementary File 6. R code for the ICGC cohort.**

# Supplementary Figure S1

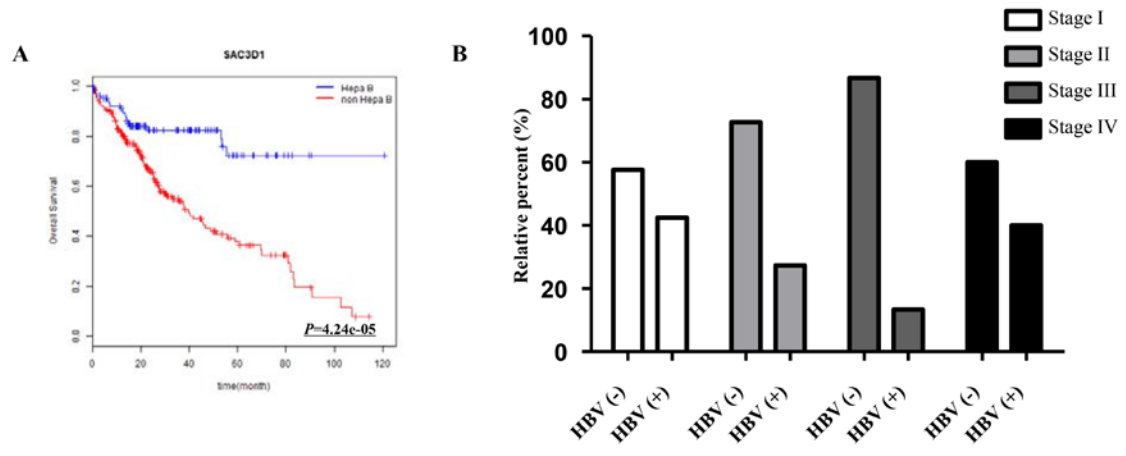

## Supplementary Figure S2

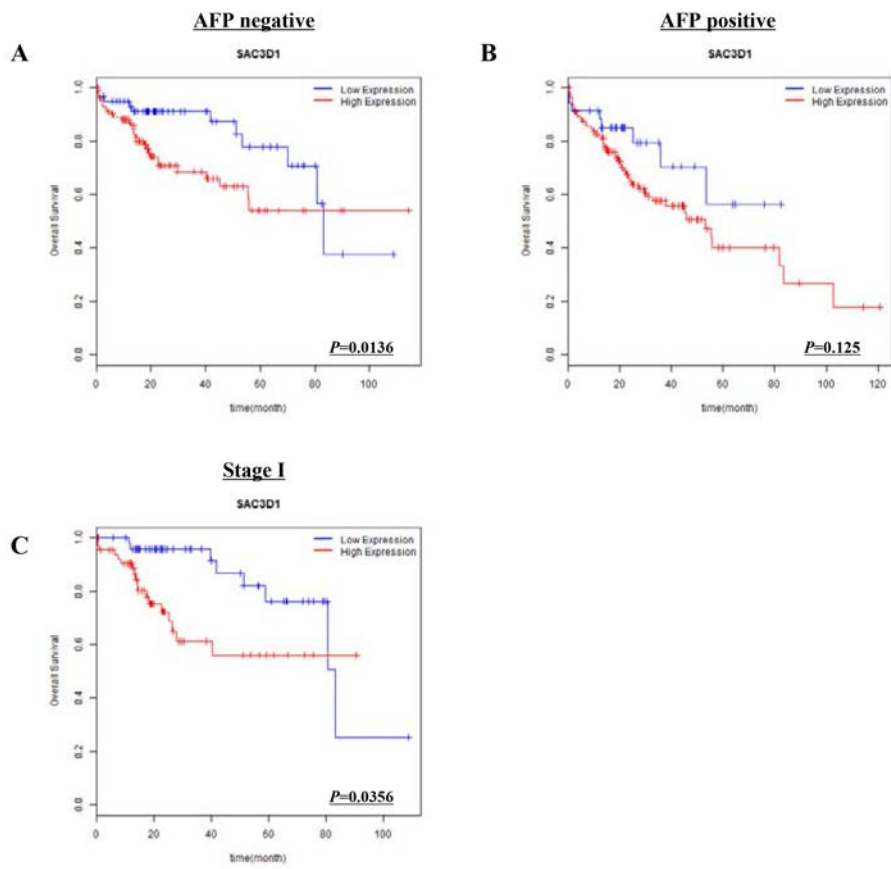

Supplementary Figure S3

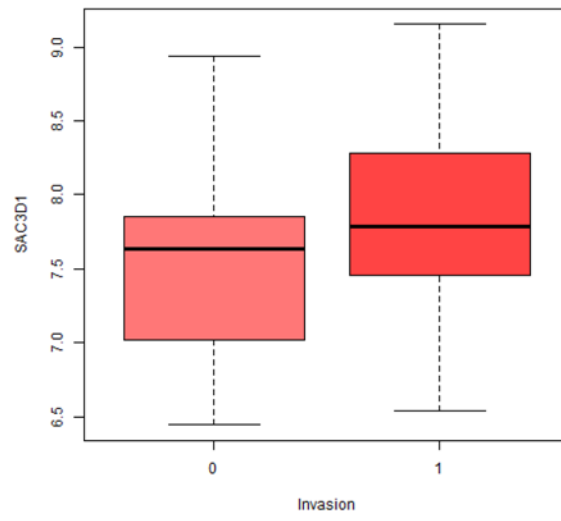

Supplementary Tables

| Gene name     | Cutoff values |          |          |
|---------------|---------------|----------|----------|
|               | GSE10186      | TCGA     | ICGC     |
| <i>SAC3D1</i> | 4485.109      | 286.1798 | 7.218211 |
| <i>BIRC5</i>  | 15929.74      | 288.3768 | 5.3804   |
| <i>CD34</i>   | 4386.906      | 1306.763 | 8.24675  |
| <i>GPC3</i>   | 12135.64      | 5818.894 | 229.1579 |
| <i>MKI67</i>  | 628.5131      | 1073.798 | 2.956712 |
| <i>TP53</i>   | 2035.01       | 632.0375 | 5.44815  |

Supplementary Table S1. Optimal cutoff values of genes in each cohort.



|               | Vascular invasion |         |   | BCLC staging |   |   |
|---------------|-------------------|---------|---|--------------|---|---|
|               | No (0)            | Yes (1) | 0 | A            | B | C |
| # of patients | 34                | 45      | 9 | 56           | 7 | 8 |

**Supplementary Table S2. Patients' information of used in current research in the GSE20238.**
